# Supplementary material for: Efficient Isolation and Functional Characterization of Niche Cells from Human Corneal Limbus
Source: MDPI journal article supplement (doi:10.3390/ijms23052750), 2022-03-02
Supplement: s1 [file s1]

## Efficient isolation and functional characterisation of niche cells from human corneal limbus

Naresh Polisetti<sup>1</sup>, Lyne Sharaf<sup>1</sup>, Ursula Schlötzer-Schrehardt<sup>2</sup>, Günther Schlunck<sup>1</sup>, Thomas Reinhard<sup>1</sup>

Supplementary Table S1: Organ cultured corneal scleral tissues used in this study.

| S.no. | Age (Years) | Post mortem time (h) | Duration of cultivation (days) |
|-------|-------------|----------------------|--------------------------------|
| 1     | 78          | 12.5                 | 27                             |
| 2     | 63          | 42.1                 | 28                             |
| 3     | 68          | 17.9                 | 28                             |
| 4     | 68          | 17.9                 | 30                             |
| 5     | 59          | 30.1                 | 27                             |
| 6     | 80          | 39.5                 | 27                             |
| 7     | 71          | 64.3                 | 20                             |
| 8     | 71          | 64.3                 | 22                             |
| 9     | 67          | 27.4                 | 19                             |
| 10    | 67          | 27.4                 | 22                             |
| 11    | 74          | 23.5                 | 26                             |
| 12    | 75          | 38.3                 | 20                             |
| 13    | 78          | 60.3                 | 23                             |
| 14    | 78          | 60.3                 | 23                             |
| 15    | 74          | 32.1                 | 23                             |
| 16    | 74          | 32.1                 | 20                             |
| 17    | 68          | 28.5                 | 21                             |
| 18    | 84          | 20.2                 | 26                             |
| 19    | 58          | 58.4                 | 23                             |
| 20    | 58          | 58.4                 | 21                             |
| 21    | 55          | 30.1                 | 29                             |
| 22    | 60          | 24.1                 | 15                             |
| 23    | 60          | 24.1                 | 20                             |
| 24    | 65          | 23.3                 | 19                             |
| 25    | 65          | 23.3                 | 19                             |
| 26    | 72          | 11.0                 | 18                             |
| 27    | 72          | 11.0                 | 27                             |
| 28    | 55          | 26.5                 | 25                             |
| 29    | 88          | 15.2                 | 19                             |
| 30    | 88          | 15.2                 | 24                             |
| 31    | 83          | 65.4                 | 23                             |
| 32    | 83          | 65.4                 | 21                             |
| 33    | 56          | 41.5                 | 23                             |
| 34    | 56          | 41.5                 | 21                             |
| 35    | 86          | 64.0                 | 29                             |
| 36    | 82          | 16.4                 | 21                             |
| 37    | 64          | 30.4                 | 25                             |
| 38    | 74          | 63.3                 | 23                             |
| 39    | 75          | 18.0                 | 21                             |
| 40    | 83          | 14.5                 | 27                             |
| 41    | 83          | 14.5                 | 25                             |
| 42    | 56          | 26.4                 | 26                             |
| 43    | 56          | 26.4                 | 19                             |

|    |    |      |    |
|----|----|------|----|
| 44 | 54 | 68.2 | 21 |
| 45 | 54 | 68.2 | 21 |
| 46 | 84 | 19.4 | 23 |
| 47 | 84 | 19.4 | 21 |
| 48 | 64 | 28.0 | 22 |
| 49 | 64 | 28.0 | 27 |
| 50 | 59 | 33.2 | 28 |
| 51 | 59 | 33.2 | 28 |
| 52 | 72 | 27.3 | 26 |
| 53 | 71 | 47.3 | 25 |
| 54 | 79 | 26.4 | 26 |
| 55 | 79 | 26.4 | 24 |
| 56 | 71 | 29.0 | 2  |
| 57 | 71 | 29.0 | 23 |
| 58 | 63 | 26.1 | 28 |
| 59 | 63 | 26.1 | 28 |
| 60 | 87 | 18.3 | 29 |
| 61 | 80 | 68.3 | 28 |
| 62 | 80 | 68.3 | 26 |
| 63 | 72 | 36.0 | 24 |
| 64 | 72 | 36.0 | 26 |
| 65 | 64 | 22.3 | 26 |
| 66 | 64 | 22.3 | 24 |
| 67 | 67 | 42.3 | 28 |
| 68 | 67 | 42.3 | 30 |
| 69 | 70 | 47.3 | 22 |
| 70 | 70 | 47.3 | 27 |
| 71 | 74 | 19.0 | 25 |
| 72 | 74 | 19.0 | 25 |
| 73 | 70 | 35.5 | 26 |
| 74 | 74 | 18.1 | 27 |
| 75 | 74 | 18.1 | 1  |
| 76 | 53 | 45.5 | 28 |
| 77 | 61 | 59.4 | 28 |
| 78 | 67 | 11.3 | 26 |
| 79 | 67 | 11.3 | 26 |
| 80 | 85 | 42.1 | 1  |
| 81 | 76 | 24.4 | 29 |
| 82 | 48 | 18.3 | 24 |
| 83 | 79 | 21.0 | 21 |
| 84 | 80 | 69.3 | 22 |
| 85 | 70 | 15.1 | 21 |
| 86 | 70 | 15.1 | 28 |
| 87 | 84 | 65.4 | 27 |
| 88 | 84 | 65.4 | 25 |
| 89 | 78 | 24.1 | 25 |
| 90 | 78 | 24.1 | 25 |
| 91 | 68 | 25.3 | 24 |
| 92 | 68 | 25.3 | 26 |
| 93 | 89 | 24.4 | 24 |
| 94 | 31 | 69.1 | 23 |
| 95 | 68 | 44.4 | 26 |
| 96 | 63 | 41.0 | 26 |
| 97 | 77 | 41.1 | 21 |

|     |    |      |    |
|-----|----|------|----|
| 98  | 63 | 36.1 | 28 |
| 99  | 54 | 43.2 | 28 |
| 100 | 54 | 43.2 | 28 |
| 101 | 77 | 43.2 | 25 |
| 102 | 71 | 11.5 | 25 |
| 103 | 65 | 46.7 | 23 |
| 104 | 87 | 37.1 | 32 |
| 105 | 77 | 15.2 | 31 |
| 106 | 60 | 44.3 | 30 |
| 107 | 82 | 5.4  | 26 |
| 108 | 58 | 13.4 | 28 |
| 109 | 62 | 7.5  | 25 |
| 110 | 62 | 7.5  | 27 |
| 111 | 50 | 62.2 | 24 |
| 112 | 50 | 62.2 | 23 |
| 113 | 86 | 13.1 | 21 |
| 114 | 86 | 13.1 | 28 |
| 115 | 69 | 45.4 | 21 |

**Supplementary Table S2.** List of antibodies used.

| <b>Antibody (clone), Host species</b> | <b>Antibody dilution</b>            | <b>Application</b>                         | <b>Antibody source</b>         |
|---------------------------------------|-------------------------------------|--------------------------------------------|--------------------------------|
| Aggrecan, goat                        | 10 µg/mL                            | Immunocytochemistry                        | R&D systems                    |
| Cadherin-E (24E10), rabbit            | 1:200                               | Immunohistochemistry                       | Cell signaling                 |
| Cadherin-P (A-10), Mouse              | 1:100                               | Immunohistochemistry                       | Santa Cruz Biotechnology, INC. |
| CD11c, PE(3.9), Mouse                 | 5 µl/10 <sup>6</sup> cells          | Flow cytometry                             | BioLegend                      |
| CD14 PE(M5E2), Mouse                  | 5 µl/10 <sup>6</sup> cells          | Flow cytometry                             | BioLegend                      |
| CD19 PE(H1B19), Mouse                 | 5 µl/10 <sup>6</sup> cells          | Flow cytometry                             | BioLegend                      |
| CD44 PE(IM7), Mouse                   | 5 µl/10 <sup>6</sup> cells          | Flow cytometry                             | BioLegend                      |
| CD45 PE(H130), Mouse                  | 5 µl/10 <sup>6</sup> cells          | Flow cytometry                             | BioLegend                      |
| CD73 PE(AD2), Mouse                   | 5 µl/10 <sup>6</sup> cells          | Flow cytometry                             | BioLegend                      |
| CD90 PE(5E10), Mouse                  | 5 µl/10 <sup>6</sup> cells          | Flow cytometry                             | BioLegend                      |
| CD90 APC(5E10), Mouse                 | 5 µl/10 <sup>6</sup> cells<br>1:400 | Flow cytometry<br>Immunohist/cytochemistry | BD Biosciences                 |
| CD105 PE(43A3), Mouse                 | 5 µl/10 <sup>6</sup> cells          | Flow cytometry                             | BioLegend                      |
| CD117 PE (A3C6E2), Mouse              | 5 µl/10 <sup>6</sup> cells          | Flow cytometry                             | Miltenyi Biotec                |
| Cytokeratin pan (PCK-26), mouse       | 1:500                               | Immunohistochemistry                       | Abcam                          |
| Cytokeratin 3/76 (AE5), mouse         | 1:100                               | Immunohisto/cytochemistry                  | Millipore                      |
| Cytokeratin 12 (EPR17882), rabbit     | 1:50                                | Immunohistochemistry                       | Abcam                          |
| Cytokeratin 14 (LL002) Mouse          | 1:500                               | Immunohisto/cytochemistry                  | Abcam                          |
| Cytokeratin 15 (LHK15), mouse         | 1:500                               | Immunohistochemistry                       | Abcam                          |

|                                        |                            |                           |                |
|----------------------------------------|----------------------------|---------------------------|----------------|
| Cytokeratin 15 (EPR1614Y), rabbit      | 1:500                      | Immunohistochemistry      | Abcam          |
| Cytokeratin 17/19 (D4G2), rabbit       | 1:200                      | Immunohisto/cytochemistry | Cell signaling |
| FABP4, goat                            | 10 µg/mL                   | Immunocytochemistry       | R&D systems    |
| HMB-45 (HMB45), mouse                  | 0.5 µg/ml                  | Immunocytochemistry       | Abcam          |
| IgG2a, k, Isotype PE (MOPC-173), mouse | 5 µl/10 <sup>6</sup> cells | Flow cytometry            | Biologend      |
| IgG3, k Isotype FITC (MG3-35), mouse   | 5 µl/10 <sup>6</sup> cells | Flow cytometry            | Biologend      |
| IgG2a, k Isotype APC (eBM2a), mouse    | 5 µl/10 <sup>6</sup> cells | Flow cytometry            | Invitrogen     |
| Ki-67 (EPR3610), rabbit                | 1:500                      | Immunohistochemistry      | Abcam          |
| Osteocalcin, mouse                     | 10 µg/mL                   | Immunocytochemistry       | R&D systems    |
| Melan A, (EPR20380), rabbit            | 1:1000                     | Immunohisto/cytochemistry | Abcam          |
| Melan A, (788), mouse                  | 0.5 µg/mL                  | Immunohisto/cytochemistry | Novusbio       |
| p63 (Y289), rabbit                     | 1:200                      | Immunohistochemistry      | Abcam          |
| Sox10 (EPR4007)                        | 1:500                      | Immunocytochemistry       | Abcam          |
| TRP1 (EPR21960)                        | 1:1000                     | Immunocytochemistry       | Abcam          |
| Vimentin, (D21H3), rabbit              | 1:500                      | Immunohistochemistry      | Cell Signaling |
| Vimentin (280618), rat                 | 8 µg/mL                    | Immunohisto/cytochemistry | R&D systems    |
